# Supplementary material for: A commercial seaweed extract structured microbial communities associated with tomato and pepper roots and significantly increased crop yield
Source: PubMed Central journal article supplement — Microb Biotechnol. 2019 Aug 26;12(6):1346–58. doi: 10.1111/1751-7915.13473 (PMC6801128; doi:10.1111/1751-7915.13473), 2019-08-26
Supplement: MBT2-12-1346-s001.pdf [file MBT2-12-1346-s001.pdf]

# Supplementary Figures & Tables: A commercial seaweed extract structured microbial communities associated with tomato and pepper roots and significantly increased crop yield

**Sébastien Renaut<sup>1,2</sup>, Jacynthe Masse<sup>1,2</sup>, Jeffrey P. Norrie<sup>3</sup>, Bachar Blal<sup>3</sup>, Mohamed Hijri<sup>1,2</sup>**

| Tomato [cv: Totem Hybrid#A371, William Dam Seeds Ltd] |      |      |    |
|-------------------------------------------------------|------|------|----|
|                                                       |      | P+   | P- |
| bloc 1                                                | P+F- | P-F- |    |
|                                                       | P+F+ | P-F+ |    |
| bloc 2                                                | P+F+ | P-F+ |    |
|                                                       | P+F- | P-F- |    |
| bloc 3                                                | P-F- | P+F+ |    |
|                                                       | P-F+ | P+F- |    |
| bloc 4                                                | P+F+ | P-F+ |    |
|                                                       | P+F- | P-F- |    |
| bloc 5                                                | P-F- | P+F+ |    |
|                                                       | P-F+ | P+F- |    |
| bloc 6                                                | P-F+ | P+F- |    |
|                                                       | P-F- | P+F+ |    |
| bloc 7                                                | P-F- | P+F- |    |
|                                                       | P-F+ | P+F+ |    |
| bloc 8                                                | P+F+ | P-F- |    |
|                                                       | P+F- | P-F+ |    |
| Pepper [cv: Ace Hybrid#318, William Dam Seeds Ltd]    |      |      |    |
| bloc 1                                                | P-F- | P+F+ |    |
|                                                       | P-F+ | P+F- |    |
| bloc 2                                                | P+F- | P-F+ |    |
|                                                       | P+F+ | P-F- |    |
| bloc 3                                                | P+F- | P-F- |    |
|                                                       | P+F+ | P-F+ |    |
| bloc 4                                                | P+F- | P-F+ |    |
|                                                       | P+F+ | P-F- |    |
| bloc 5                                                | P-F+ | P+F- |    |
|                                                       | P-F- | P+F+ |    |
| bloc 6                                                | P+F+ | P-F+ |    |
|                                                       | P+F- | P-F- |    |
| bloc 7                                                | P+F- | P-F- |    |
|                                                       | P+F+ | P-F+ |    |
| bloc 8                                                | P+F+ | P-F+ |    |
|                                                       | P+F- | P-F- |    |

Table S1: Randomized split block design for the tomato and pepper experiments

Table S2: Soil characteristics (in *ppm* unless specified otherwise)

| Soil Characteristics    | Average value |
|-------------------------|---------------|
| pH                      | 6.01          |
| Conductivity (mmhos/cm) | 0.68          |
| Nitrate (N)             | 62.40         |
| Ammonium                | 0.09          |
| Phosphorus              | 0.41          |
| Potassium               | 29.30         |
| Calcium                 | 64.40         |
| Magnesium               | 13.80         |
| Chloride                | 28.50         |
| Sulfate                 | 19.30         |
| Sodium                  | 17.80         |
| Zinc                    | 0.12          |
| Manganese               | 0.06          |
| Cooper                  | 0.81          |
| Iron                    | 0.90          |
| Aluminium               | 1.66          |

Table S3: Stella Maris® characteristics

| Stella Maris® characteristics                            | Average value                     |
|----------------------------------------------------------|-----------------------------------|
| Appearance                                               | Viscous Brownish-Black Liquid     |
| Odor                                                     | Marine Odor                       |
| Solubility in water (%)                                  | 100                               |
| pH                                                       | 7.4 - 8.2                         |
| Carbohydrates                                            | Alginic acid, Mannitol, Fucoidans |
| Organic matter content (%)                               | 13.0 - 16.0                       |
| Total Nitrogen (N) (%)                                   | 0.1 - 0.6                         |
| Available phosphate (P <sub>2</sub> O <sub>5</sub> ) (%) | < 0.2                             |
| Soluble potash (K <sub>2</sub> O) (%)                    | 5.0 - 7.0                         |
| Sulphur (S) (%)                                          | 0.3 - 0.6                         |
| Magnesium (Mg) (%)                                       | 0.05 - 0.15                       |
| Calcium (Ca) (%)                                         | 0.05 - 0.15                       |
| Sodium (Na) (%)                                          | 0.7 - 1.2                         |
| Iron (Fe) (ppm)                                          | 30 - 90                           |
| Cooper (Cu) (ppm)                                        | < 4                               |
| Manganese (Mn) (ppm)                                     | 3 - 11                            |
| Boron (B) (ppm)                                          | 20 - 40                           |

Table S4: Summary of sequencing statistics and bioinformatics identification of ASV

|                                        | fungi-soil | fungi-root | bacteria-soil | bacteria-root |
|----------------------------------------|------------|------------|---------------|---------------|
| No sequences (sum)                     | 976,000    | 309,000    | 920,000       | 535,000       |
| No sequences (mean)                    | 50,847     | 32,208     | 47,907        | 56,365        |
| No seq. filtered (mean)                | 32,626     | 12,714     | 29,662        | 37,642        |
| No seq. filt. merged (mean)            | 29,300     | 12,094     | 14,060        | 30,706        |
| No seq. filt. merg. no chimeras (mean) | 25,476     | 9,849      | 13,521        | 30,408        |
| No samples                             | 192        | 96         | 192           | 96            |
| No samples trimmed                     | 189        | 81         | 192           | 95            |
| No ASV (sum)                           | 6,112      | 845        | 9,352         | 2,023         |
| No ASV trimmed (sum)                   | 413        | 106        | 807           | 262           |
| No ASV trimmed per sample (mean)       | 125        | 29         | 194           | 45            |

*No sequences (sum)*: Total number of paired-end sequencing reads per biotope. *No sequences (mean)*: Average number of paired-end sequencing reads per sample. *No seq. filtered (mean)*: Total number of filtered paired-end sequencing reads per sample. *No seq. filt. merged (mean)*: Number of filtered paired-end sequencing reads merged per sample. *No seq. filt. merg. no chimeras (mean)*: Average Number of filtered paired-end sequencing reads merged, removing chimeras per sample. *No samples*: Number of samples. *No samples trimmed*: Number of samples, filtering out low quality samples. *No ASV (sum)*: Total number of ASV. *No ASV trimmed (sum)*: Total number of ASV, filtering out low abundance ASV and chloroplast or mitochondrial ASV for bacterial samples. *No ASV trimmed per sample (mean)*: Average number of filtered ASV per sample.

Table S5: Variance explained by the terms in the PERMANOVA models.

|                           | fungi-soil | fungi-root | bacteria-soil | bacteria-root |
|---------------------------|------------|------------|---------------|---------------|
| amendment                 | 0.02***    | 0.08***    | 0.04***       | 0.19***       |
| planted                   | 0.21***    | NA         | 0.13***       | NA            |
| species                   | 0.02***    | 0.26***    | 0.02***       | 0.20***       |
| amendment:planted         | 0.01**     | NA         | 0.02***       | NA            |
| amendment:species         | 0.01*      | 0.04*      | 0.03***       | 0.05***       |
| planted:species           | 0.01       | NA         | 0.01**        | NA            |
| amendment:planted:species | 0.01       | NA         | 0.01*         | NA            |

$r^2$  (percentage of variance explained by the term in the model); \* $p$ -value<0.05, \*\*<0.005, \*\*\*<0.0005

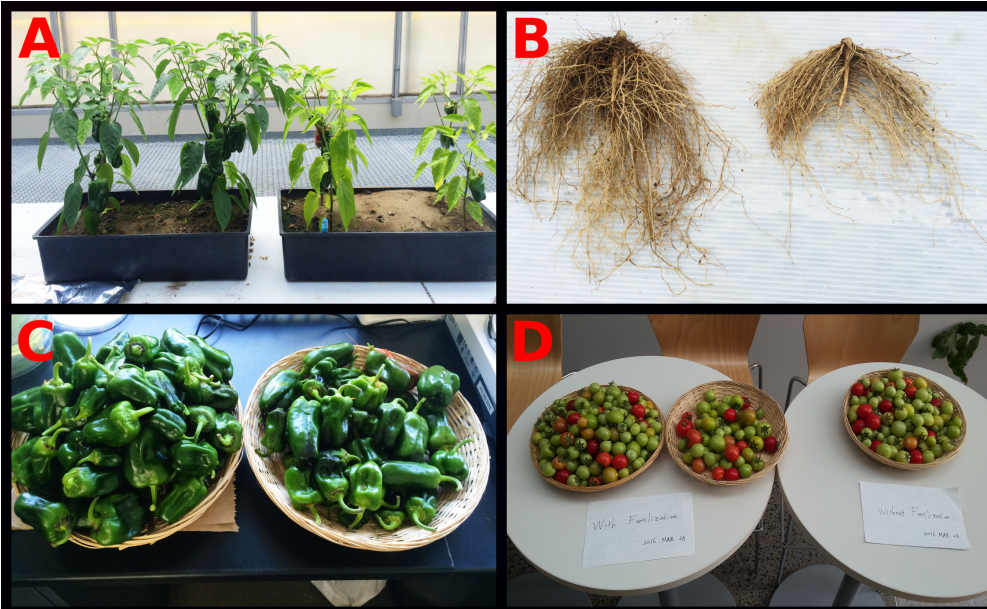

**Figure S1: Plant productivity.** Photos were taken at the end of the experimental treatment. In each photo, amended plants are on the left. **A:** pepper shoots, **B:** pepper roots, **C:** pepper fruits and **D:** tomato fruits.

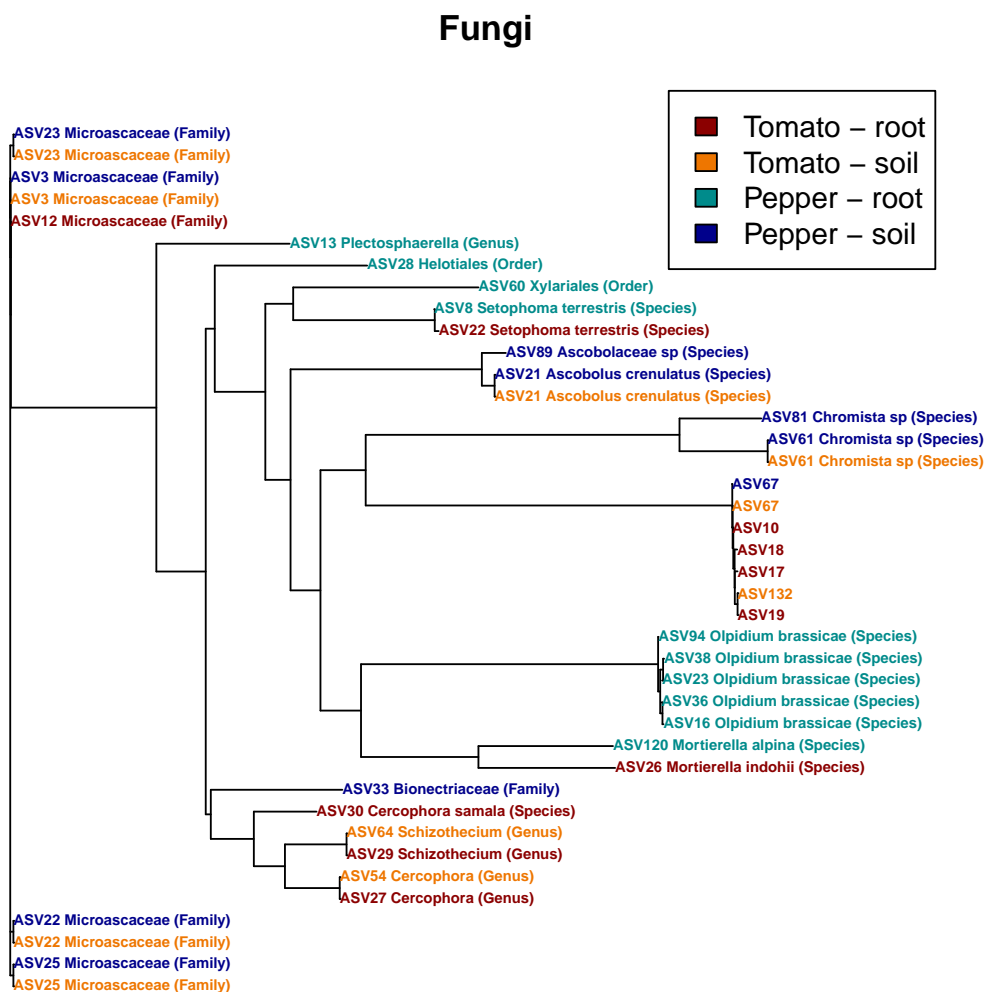

Figure S2: Neighbor-Joining trees of candidates ASV (fungi) most positively associated with productivity measures as identified in Figure 5. The most accurate taxonomy assigned according to the RDP bayesian classifier (form Phylum to species) was added as tip labels.



## Bacteria

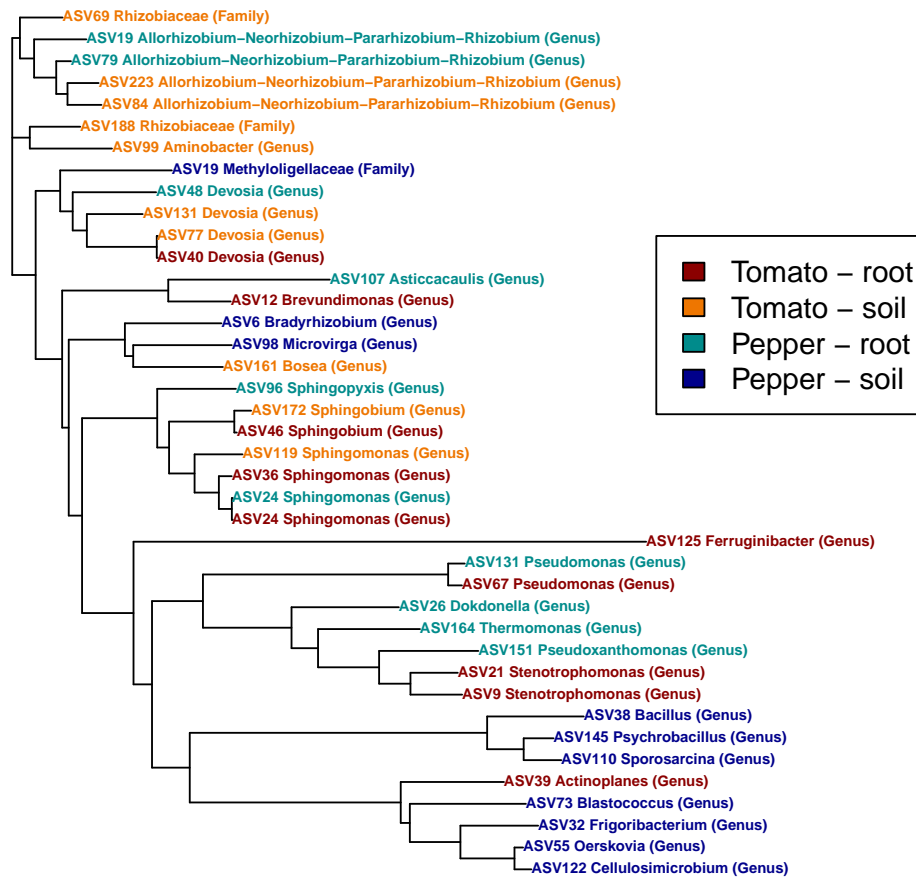

Figure S3: Neighbor-Joining trees of candidates ASV (bacteria) most positively associated with productivity measures as identified in Figure 6. The most accurate taxonomy assigned according to the RDP bayesian classifier (form Phylum to species) was added as tip labels.
